# Supplementary material
Source: PubMed Central journal article supplement (PMC3721120)

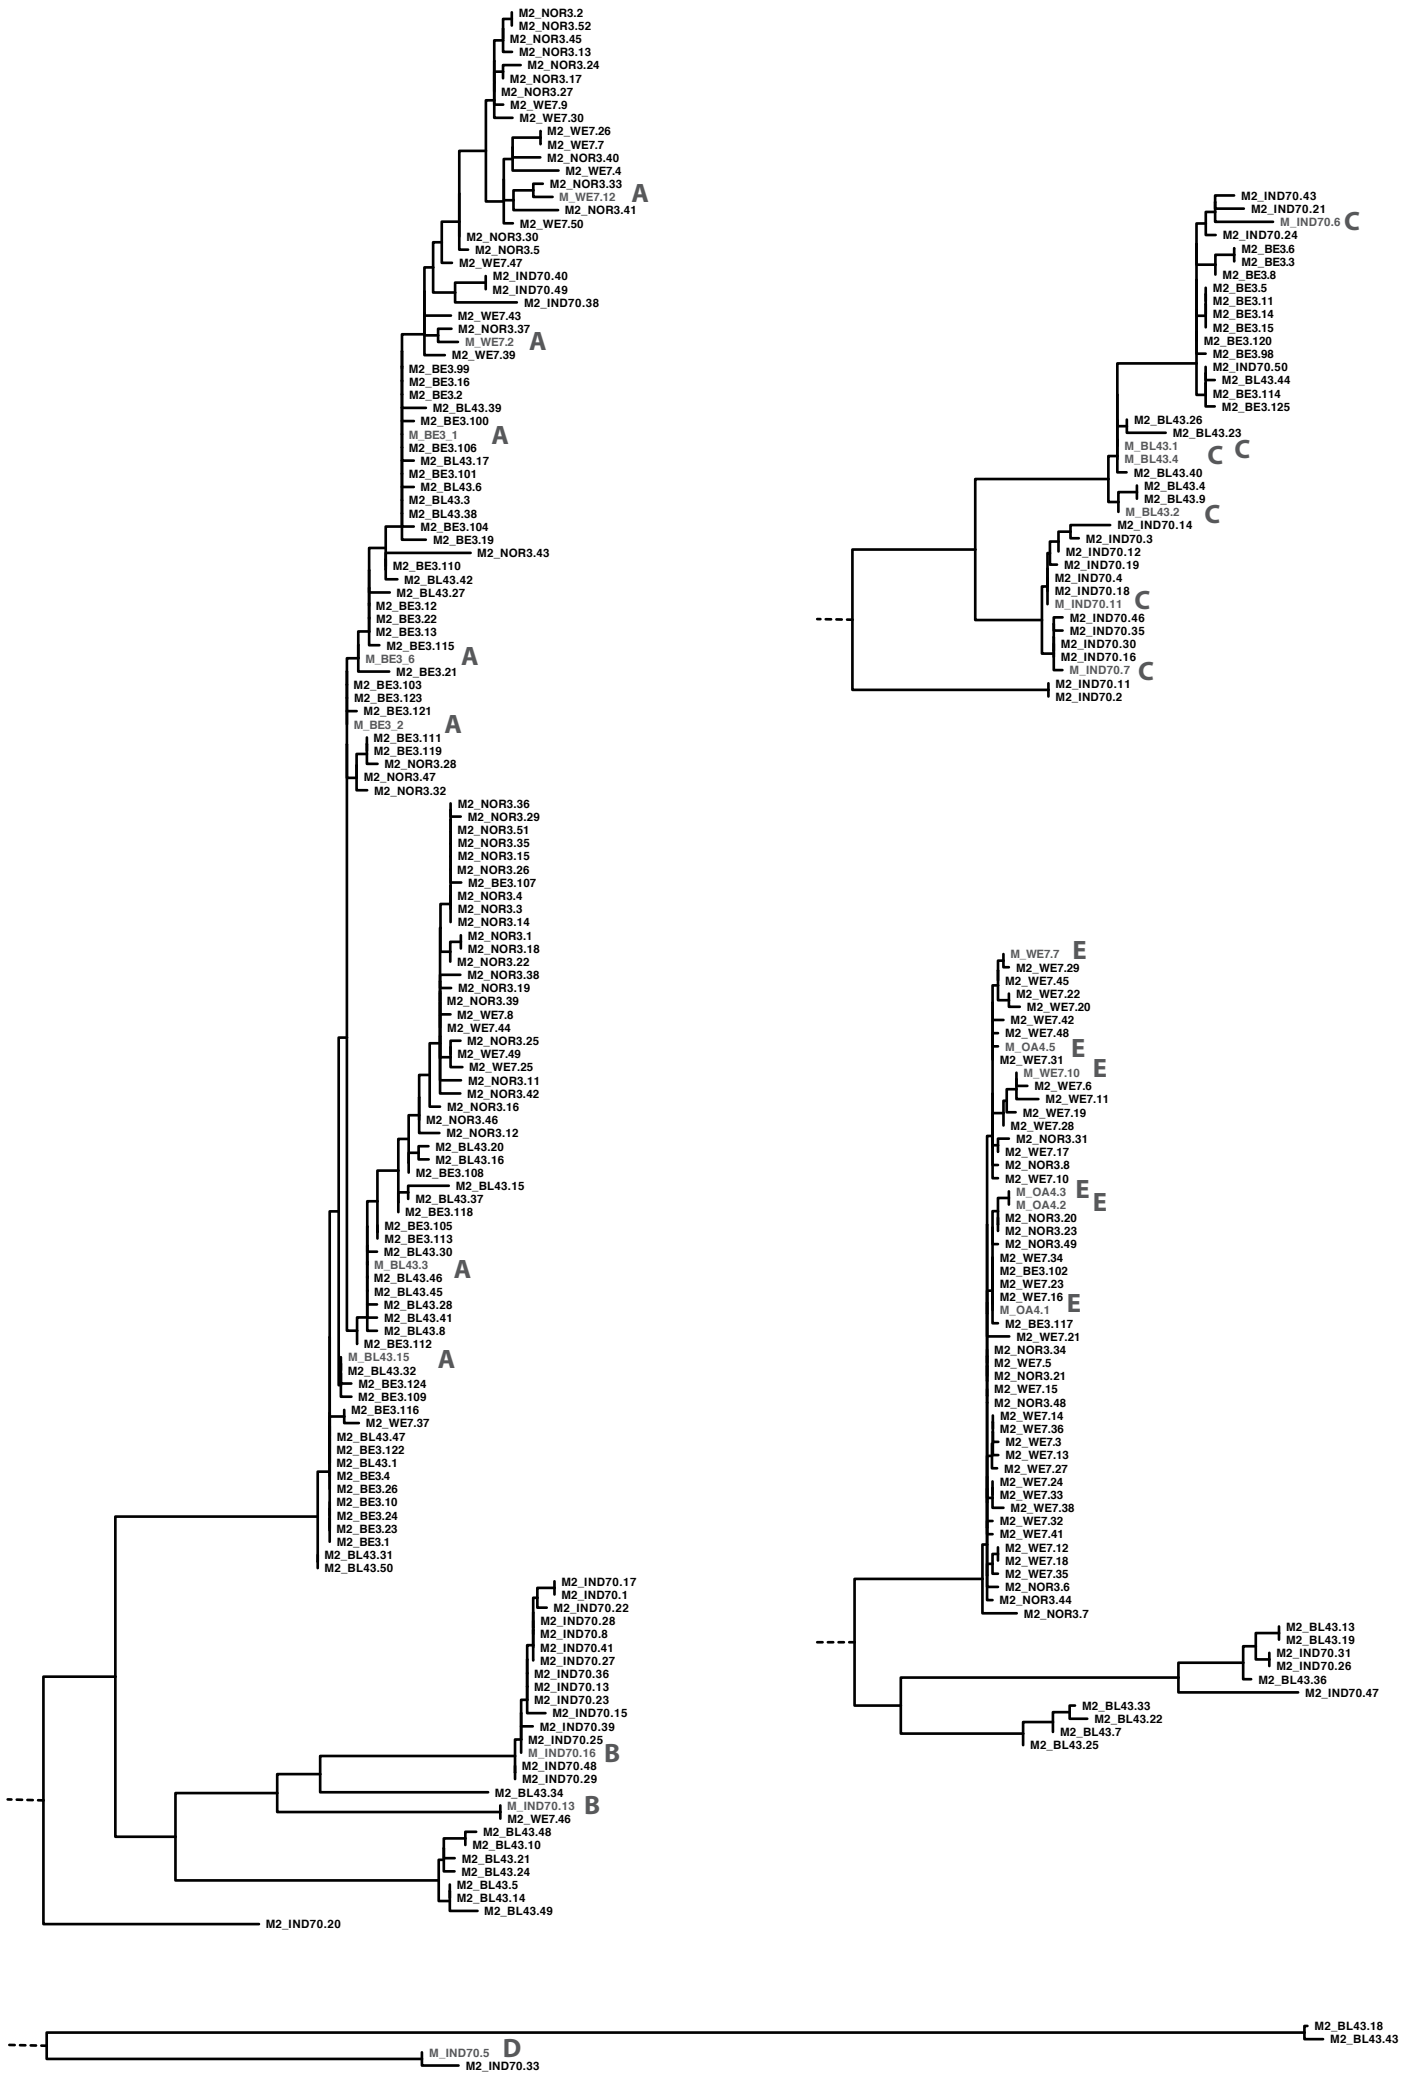

Supplement: ismej201353x1.pdf [file ismej201353x1.pdf]
